# Supplementary material for: The protective effect of polyunsaturated fatty acid intake during pregnancy against embryotoxicity of sodium valproate in mice
Source: Royal Society of Chemistry journal article supplement (doi:10.1039/c7fo01604b), 2018-01-01
Supplement: c7fo01604b1.pdf [file c7fo01604b1.pdf]

**Table S1** Fatty acids composition of mouse fodders fortified by different oils (% , w/w)

| Fatty acids | Olive oil<br>fortified feeds | Flaxseed oil<br>fortified feeds | Fish oil<br>fortified feeds | Corn oil<br>fortified feeds |
|-------------|------------------------------|---------------------------------|-----------------------------|-----------------------------|
| C14:0       | 0.46361                      | 0.43433                         | 0.67803                     | 0.35328                     |
| C14:1       | 0.02137                      | 0.02067                         | 0.02399                     | 0.01719                     |
| C15:0       | 0.07426                      | 0.07131                         | 0.09739                     | 0.05847                     |
| C16:0       | 12.25462                     | 9.05732                         | 7.94123                     | 13.54229                    |
| C16:1       | 0.63377                      | 0.31176                         | 0.66373                     | 0.28579                     |
| C18:0       | 3.78627                      | 4.18014                         | 3.62712                     | 3.10487                     |
| C18:1       | 74.34919                     | 36.08659                        | 31.31998                    | 44.89419                    |
| C18:2n6     | 7.0703                       | 12.95275                        | 4.36428                     | 36.1489                     |
| C18:3n6     | ND                           | ND                              | 0.02915                     | ND                          |
| C18:3n3     | 0.62836                      | 36.36632                        | 0.48704                     | 0.69361                     |
| C20:0       | 0.33972                      | 0.18824                         | 0.58572                     | 0.37507                     |
| C20:1       | 0.1821                       | 0.12288                         | 1.25049                     | 0.22816                     |
| C20:3n6     | ND                           | ND                              | 0.07839                     | ND                          |
| C20:4n6     | ND                           | ND                              | 0.6911                      | ND                          |
| C20:3n3     | ND                           | ND                              | 0.09646                     | ND                          |
| C20:5n3     | ND                           | ND                              | 7.98296                     | ND                          |
| C22:0       | 0.12864                      | 0.12325                         | 0.15372                     | 0.13561                     |
| C22:2n6     | ND                           | ND                              | 0.03631                     | ND                          |
| C22:4n6     | ND                           | ND                              | 0.23974                     | ND                          |
| C24:0       | 0.06778                      | 0.08443                         | 0.11083                     | 0.16259                     |
| C22:5n3     | ND                           | ND                              | 3.48976                     | ND                          |
| C22:6n3     | ND                           | ND                              | 36.05258                    | ND                          |

ND, not detected.

**Table S2** Primer sequences of target genes for PCR analysis

| Genes          | Forward                 | Reverse               |
|----------------|-------------------------|-----------------------|
| MTHFR          | CATCAACTCTCAGCCCAACA    | GTTTCACGGGAGGTGAAGAA  |
| SAHH           | TGAGCAGATGAAGGATGACG    | CTTTAGCCAGTAGCGGTCCA  |
| GAMT           | ATGTTTGAGGAGACGCAGGT    | GAAGGCATAGTAGCGGCAGT  |
| GNMT           | AGTCAACAACAAAGCCCACA    | GCACCAACTCCGTGAAAGA   |
| MAT1 $\alpha$  | GCTTGTTTCAGGTGTCCTATGC  | GCTCCCGCTCAGTCTTATTG  |
| CSE            | GGTGGCATCTGAATTTGGAC    | GTTGGGTTTGTGGGTGTTTC  |
| CBS            | CGCACAGGAAGGACTGCTAT    | CACAGAGTCAGGCAGGATGA  |
| BHMT           | AAGCATCTGGTAAGCCCGTA    | AGTTCACGCCGACAATGG    |
| MTR            | GGAATACTTGCTGGCTGGAG    | TGCAGAGCACTTGTTTCATCC |
| MTRR           | AGTAAACAAGGAGCCGCTGA    | GAAGGTGCTCCAGCAGTAGG  |
| SHMT1          | GTGGAAGGGCTGAGAAGGTA    | GGGATGTCAATGCTGGAGT   |
| DHFR           | GAACTCAAAGAACCACCACGA   | CTGCCTCCGACTATCCAAAC  |
| TS             | CTCTGCTCACAACCAAACGA    | GCATCCCAGATTCTCACTCC  |
| $\beta$ -actin | GTGCTATGTTGCTCTAGACTTCG | ATGCCACAGGATTCCATACC  |

**Table S3** Fatty acids composition (% w/w) in the liver of pregnant mouse on E8.5d (6h after VPA injection)

| Fatty acids | Olive oil                    | Olive oil+VPA               | Flaxseed oil+VPA             | Fish oil+VPA                | Corn oil+VPA                |
|-------------|------------------------------|-----------------------------|------------------------------|-----------------------------|-----------------------------|
| C14:0       | 0.252 ± 0.061 <sup>a</sup>   | 0.367 ± 0.017 <sup>ab</sup> | 0.359 ± 0.092 <sup>ab</sup>  | 0.308 ± 0.093 <sup>a</sup>  | 0.439 ± 0.025 <sup>b</sup>  |
| C14:1       | 0.006 ± 0.002 <sup>ab</sup>  | 0.013 ± 0.002 <sup>c</sup>  | 0.011 ± 0.007 <sup>ac</sup>  | 0.004 ± 0.001 <sup>b</sup>  | 0.012 ± 0.002 <sup>ac</sup> |
| C15:0       | 0.038 ± 0.007 <sup>a</sup>   | 0.042 ± 0.007 <sup>a</sup>  | 0.060 ± 0.007 <sup>b</sup>   | 0.068 ± 0.010 <sup>b</sup>  | 0.064 ± 0.014 <sup>b</sup>  |
| C16:0       | 19.505 ± 2.330 <sup>a</sup>  | 19.465 ± 1.715 <sup>a</sup> | 20.916 ± 1.648 <sup>a</sup>  | 25.299 ± 0.660 <sup>b</sup> | 21.669 ± 1.800 <sup>a</sup> |
| C16:1       | 1.100 ± 0.079 <sup>ac</sup>  | 3.059 ± 0.052 <sup>b</sup>  | 2.354 ± 0.839 <sup>bc</sup>  | 0.918 ± 0.227 <sup>a</sup>  | 1.962 ± 0.606 <sup>c</sup>  |
| C18:0       | 12.600 ± 0.952 <sup>ab</sup> | 9.779 ± 0.304 <sup>a</sup>  | 10.697 ± 2.327 <sup>a</sup>  | 14.327 ± 2.278 <sup>b</sup> | 9.729 ± 1.198 <sup>a</sup>  |
| C18:1       | 41.090 ± 3.704 <sup>a</sup>  | 55.197 ± 3.314 <sup>b</sup> | 34.072 ± 1.934 <sup>a</sup>  | 18.710 ± 6.554 <sup>c</sup> | 36.680 ± 6.285 <sup>a</sup> |
| C18:2n6     | 8.727 ± 0.843 <sup>ac</sup>  | 4.201 ± 0.491 <sup>b</sup>  | 11.180 ± 1.964 <sup>ad</sup> | 7.085 ± 2.150 <sup>c</sup>  | 13.416 ± 0.202 <sup>d</sup> |
| C18:3n6     | 0.080 ± 0.026 <sup>ab</sup>  | 0.120 ± 0.080 <sup>ab</sup> | 0.128 ± 0.040 <sup>a</sup>   | 0.040 ± 0.005 <sup>b</sup>  | 0.329 ± 0.046 <sup>c</sup>  |
| C18:3n3     | 0.081 ± 0.006 <sup>a</sup>   | 0.045 ± 0.007 <sup>a</sup>  | 3.663 ± 0.388 <sup>b</sup>   | 0.167 ± 0.027 <sup>a</sup>  | 0.139 ± 0.048 <sup>a</sup>  |
| C20:0       | 0.043 ± 0.009 <sup>ab</sup>  | 0.029 ± 0.017 <sup>a</sup>  | 0.048 ± 0.009 <sup>ab</sup>  | 0.053 ± 0.013 <sup>b</sup>  | 0.050 ± 0.008 <sup>ab</sup> |
| C20:1       | 0.278 ± 0.130 <sup>ab</sup>  | 0.365 ± 0.240 <sup>a</sup>  | 0.185 ± 0.022 <sup>ab</sup>  | 0.128 ± 0.023 <sup>b</sup>  | 0.224 ± 0.015 <sup>ab</sup> |
| C20:3n6     | 0.567 ± 0.127 <sup>a</sup>   | 0.356 ± 0.149 <sup>bc</sup> | 0.519 ± 0.041 <sup>ab</sup>  | 0.301 ± 0.052 <sup>c</sup>  | 0.293 ± 0.041 <sup>c</sup>  |
| C20:4n6     | 9.196 ± 0.897 <sup>a</sup>   | 4.348 ± 0.445 <sup>b</sup>  | 4.211 ± 0.528 <sup>b</sup>   | 4.888 ± 0.583 <sup>b</sup>  | 10.100 ± 2.481 <sup>a</sup> |
| C20:3n3     | 0.038 ± 0.003 <sup>a</sup>   | 0.021 ± 0.009 <sup>a</sup>  | 0.114 ± 0.020 <sup>b</sup>   | 0.063 ± 0.007 <sup>c</sup>  | 0.031 ± 0.008 <sup>a</sup>  |
| C20:5n3     | 0.102 ± 0.026 <sup>a</sup>   | 0.043 ± 0.017 <sup>a</sup>  | 3.218 ± 0.483 <sup>b</sup>   | 4.777 ± 0.883 <sup>c</sup>  | 0.036 ± 0.012 <sup>a</sup>  |
| C22:0       | 0.099 ± 0.013 <sup>ab</sup>  | 0.059 ± 0.022 <sup>a</sup>  | 0.114 ± 0.025 <sup>b</sup>   | 0.143 ± 0.032 <sup>b</sup>  | 0.104 ± 0.026 <sup>ab</sup> |
| C22:2n6     | 0.020 ± 0.001                | 0.015 ± 0.012               | 0.007 ± 0.006                | 0.007 ± 0.003               | 0.016 ± 0.011               |
| C22:4n6     | 0.095 ± 0.020 <sup>a</sup>   | 0.049 ± 0.016 <sup>b</sup>  | 0.035 ± 0.001 <sup>b</sup>   | 0.056 ± 0.014 <sup>b</sup>  | 0.154 ± 0.015 <sup>c</sup>  |
| C24:0       | 0.089 ± 0.017 <sup>a</sup>   | 0.058 ± 0.025 <sup>a</sup>  | 0.138 ± 0.073 <sup>a</sup>   | 0.268 ± 0.074 <sup>b</sup>  | 0.097 ± 0.018 <sup>a</sup>  |
| C22:5n3     | 0.075 ± 0.019 <sup>a</sup>   | 0.024 ± 0.004 <sup>a</sup>  | 0.450 ± 0.051 <sup>b</sup>   | 0.678 ± 0.191 <sup>c</sup>  | 0.057 ± 0.009 <sup>a</sup>  |
| C22:6n3     | 5.918 ± 0.749 <sup>ad</sup>  | 2.343 ± 0.675 <sup>b</sup>  | 7.521 ± 0.141 <sup>a</sup>   | 21.713 ± 2.635 <sup>c</sup> | 4.400 ± 1.183 <sup>bd</sup> |

Values marked with different letter in each group differed significantly.

**Table S4** Fatty acids composition (% w/w) in the liver of pregnant mouse on E9.5d (24h after VPA injection)

| Fatty acids | Olive oil                   | Olive oil+VPA               | Flaxseed oil+VPA            | Fish oil+VPA                | Corn oil+VPA                |
|-------------|-----------------------------|-----------------------------|-----------------------------|-----------------------------|-----------------------------|
| C14:0       | 0.262 ± 0.058 <sup>ab</sup> | 0.320 ± 0.031 <sup>a</sup>  | 0.192 ± 0.072 <sup>b</sup>  | 0.174 ± 0.019 <sup>b</sup>  | 0.318 ± 0.087 <sup>a</sup>  |
| C14:1       | 0.006 ± 0.001               | 0.007 ± 0.001               | 0.005 ± 0.002               | 0.004 ± 0.002               | 0.008 ± 0.007               |
| C15:0       | 0.042 ± 0.008 <sup>a</sup>  | 0.044 ± 0.005 <sup>a</sup>  | 0.069 ± 0.004 <sup>b</sup>  | 0.049 ± 0.007 <sup>a</sup>  | 0.047 ± 0.014 <sup>a</sup>  |
| C16:0       | 19.424 ± 2.208 <sup>a</sup> | 18.739 ± 0.724 <sup>a</sup> | 22.386 ± 0.769 <sup>b</sup> | 23.313 ± 1.511 <sup>b</sup> | 19.698 ± 1.422 <sup>a</sup> |
| C16:1       | 1.115 ± 0.057 <sup>ab</sup> | 1.679 ± 0.065 <sup>a</sup>  | 1.162 ± 0.522 <sup>ab</sup> | 0.545 ± 0.027 <sup>b</sup>  | 1.310 ± 1.011 <sup>ab</sup> |
| C18:0       | 12.641 ± 1.696              | 13.203 ± 3.267              | 13.916 ± 1.252              | 17.377 ± 0.589              | 13.648 ± 5.570              |
| C18:1       | 40.433 ± 5.030 <sup>a</sup> | 48.789 ± 2.751 <sup>b</sup> | 19.903 ± 1.983 <sup>c</sup> | 15.132 ± 0.887 <sup>c</sup> | 32.513 ± 6.630 <sup>d</sup> |
| C18:2n6     | 9.008 ± 0.955 <sup>ac</sup> | 5.746 ± 0.856 <sup>a</sup>  | 15.369 ± 0.672 <sup>b</sup> | 9.547 ± 1.160 <sup>c</sup>  | 15.508 ± 3.693 <sup>b</sup> |
| C18:3n6     | 0.087 ± 0.025 <sup>a</sup>  | 0.059 ± 0.006 <sup>a</sup>  | 0.048 ± 0.001 <sup>a</sup>  | 0.038 ± 0.009 <sup>a</sup>  | 0.206 ± 0.094 <sup>b</sup>  |
| C18:3n3     | 0.089 ± 0.008 <sup>a</sup>  | 0.043 ± 0.011 <sup>a</sup>  | 5.323 ± 1.077 <sup>b</sup>  | 0.155 ± 0.063 <sup>a</sup>  | 0.104 ± 0.041 <sup>a</sup>  |
| C20:0       | 0.049 ± 0.012 <sup>a</sup>  | 0.035 ± 0.002 <sup>b</sup>  | 0.079 ± 0.009 <sup>c</sup>  | 0.056 ± 0.003 <sup>a</sup>  | 0.049 ± 0.006 <sup>ab</sup> |
| C20:1       | 0.280 ± 0.138 <sup>a</sup>  | 0.343 ± 0.085 <sup>a</sup>  | 0.234 ± 0.027 <sup>ab</sup> | 0.079 ± 0.004 <sup>b</sup>  | 0.244 ± 0.125 <sup>ab</sup> |
| C20:3n6     | 0.597 ± 0.208 <sup>a</sup>  | 0.641 ± 0.027 <sup>a</sup>  | 0.634 ± 0.030 <sup>a</sup>  | 0.341 ± 0.029 <sup>b</sup>  | 0.403 ± 0.074 <sup>b</sup>  |
| C20:4n6     | 9.463 ± 1.098 <sup>ac</sup> | 6.454 ± 0.491 <sup>ab</sup> | 4.464 ± 0.582 <sup>b</sup>  | 6.058 ± 0.325 <sup>b</sup>  | 10.733 ± 3.553 <sup>c</sup> |
| C20:3n3     | 0.041 ± 0.006 <sup>a</sup>  | 0.033 ± 0.004 <sup>a</sup>  | 0.333 ± 0.075 <sup>b</sup>  | 0.054 ± 0.012 <sup>a</sup>  | 0.043 ± 0.016 <sup>a</sup>  |
| C20:5n3     | 0.112 ± 0.034 <sup>a</sup>  | 0.083 ± 0.013 <sup>a</sup>  | 4.934 ± 1.330 <sup>b</sup>  | 4.602 ± 1.461 <sup>b</sup>  | 0.044 ± 0.015 <sup>a</sup>  |
| C22:0       | 0.113 ± 0.022 <sup>ac</sup> | 0.077 ± 0.005 <sup>a</sup>  | 0.169 ± 0.017 <sup>b</sup>  | 0.112 ± 0.015 <sup>ac</sup> | 0.120 ± 0.035 <sup>c</sup>  |
| C22:2n6     | 0.020 ± 0.009 <sup>a</sup>  | 0.018 ± 0.005 <sup>a</sup>  | 0.016 ± 0.005 <sup>ab</sup> | 0.007 ± 0.005 <sup>bc</sup> | 0.006 ± 0.001 <sup>c</sup>  |
| C22:4n6     | 0.105 ± 0.013 <sup>a</sup>  | 0.068 ± 0.007 <sup>ab</sup> | 0.043 ± 0.003 <sup>b</sup>  | 0.071 ± 0.023 <sup>ab</sup> | 0.147 ± 0.042 <sup>c</sup>  |
| C24:0       | 0.097 ± 0.022 <sup>a</sup>  | 0.074 ± 0.009 <sup>a</sup>  | 0.167 ± 0.043 <sup>b</sup>  | 0.152 ± 0.016 <sup>b</sup>  | 0.110 ± 0.028 <sup>a</sup>  |
| C22:5n3     | 0.082 ± 0.024 <sup>a</sup>  | 0.038 ± 0.004 <sup>a</sup>  | 0.824 ± 0.141 <sup>b</sup>  | 0.864 ± 0.060 <sup>b</sup>  | 0.066 ± 0.039 <sup>a</sup>  |
| C22:6n3     | 5.931 ± 0.680 <sup>a</sup>  | 3.506 ± 0.162 <sup>b</sup>  | 9.730 ± 1.350 <sup>c</sup>  | 21.268 ± 0.464 <sup>d</sup> | 4.676 ± 1.420 <sup>ab</sup> |

Values marked with different letter in each group differed significantly.

**Table S5** Fatty acids composition (% w/w) in embryo on E8.5d (6h after VPA injection)

| Fatty acids | Olive oil                    | Olive oil+VPA                | Flaxseed<br>oil+VPA          | Fish oil+VPA                | Corn oil+VPA                |
|-------------|------------------------------|------------------------------|------------------------------|-----------------------------|-----------------------------|
| C14:0       | 0.539 ± 0.008 <sup>ab</sup>  | 0.546 ± 0.069 <sup>ab</sup>  | 0.458 ± 0.077 <sup>a</sup>   | 0.571 ± 0.084 <sup>b</sup>  | 0.522 ± 0.021 <sup>ab</sup> |
| C14:1       | 0.067 ± 0.012 <sup>a</sup>   | 0.149 ± 0.040 <sup>b</sup>   | 0.108 ± 0.029 <sup>ab</sup>  | 0.109 ± 0.045 <sup>ab</sup> | 0.064 ± 0.002 <sup>a</sup>  |
| C15:0       | 0.281 ± 0.096 <sup>ab</sup>  | 0.185 ± 0.020 <sup>a</sup>   | 0.159 ± 0.138 <sup>a</sup>   | 0.466 ± 0.206 <sup>b</sup>  | 0.221 ± 0.032 <sup>a</sup>  |
| C16:0       | 17.663 ± 1.208 <sup>ab</sup> | 17.556 ± 1.964 <sup>ab</sup> | 17.886 ± 0.895 <sup>ab</sup> | 19.740 ± 2.032 <sup>a</sup> | 17.165 ± 0.490 <sup>b</sup> |
| C16:1       | 1.379 ± 0.522                | 1.522 ± 0.195                | 1.267 ± 0.146                | 1.446 ± 0.318               | 1.787 ± 0.071               |
| C18:0       | 20.574 ± 0.471 <sup>a</sup>  | 19.275 ± 2.984 <sup>a</sup>  | 21.320 ± 1.688 <sup>ab</sup> | 20.632 ± 0.195 <sup>a</sup> | 23.309 ± 0.458 <sup>b</sup> |
| C18:1       | 19.283 ± 1.128 <sup>a</sup>  | 23.533 ± 3.683 <sup>b</sup>  | 16.342 ± 1.048 <sup>ac</sup> | 15.919 ± 0.391 <sup>c</sup> | 15.275 ± 0.468 <sup>c</sup> |
| C18:2n6     | 7.394 ± 0.332 <sup>a</sup>   | 7.496 ± 1.669 <sup>a</sup>   | 10.783 ± 1.014 <sup>b</sup>  | 4.391 ± 0.720 <sup>c</sup>  | 11.063 ± 0.796 <sup>b</sup> |
| C18:3n6     | 0.106 ± 0.039 <sup>ab</sup>  | 0.068 ± 0.005 <sup>ac</sup>  | 0.059 ± 0.010 <sup>c</sup>   | 0.065 ± 0.029 <sup>c</sup>  | 0.137 ± 0.010 <sup>b</sup>  |
| C18:3n3     | 0.069 ± 0.008 <sup>a</sup>   | 0.066 ± 0.001 <sup>a</sup>   | 0.872 ± 0.050 <sup>b</sup>   | 0.054 ± 0.009 <sup>a</sup>  | 0.040 ± 0.014 <sup>a</sup>  |
| C20:0       | 0.161 ± 0.052 <sup>a</sup>   | 0.138 ± 0.019 <sup>a</sup>   | 0.069 ± 0.026 <sup>b</sup>   | 0.133 ± 0.022 <sup>a</sup>  | 0.100 ± 0.056 <sup>ab</sup> |
| C20:1       | 0.154 ± 0.082 <sup>a</sup>   | 0.106 ± 0.022 <sup>ab</sup>  | 0.052 ± 0.034 <sup>b</sup>   | 0.116 ± 0.025 <sup>ab</sup> | 0.086 ± 0.044 <sup>ab</sup> |
| C20:3n6     | 2.268 ± 1.454 <sup>a</sup>   | 1.548 ± 0.221 <sup>ab</sup>  | 1.437 ± 0.401 <sup>ab</sup>  | 0.871 ± 0.451 <sup>b</sup>  | 1.040 ± 0.073 <sup>ab</sup> |
| C20:4n6     | 19.590 ± 2.380 <sup>a</sup>  | 18.079 ± 2.308 <sup>a</sup>  | 9.014 ± 0.631 <sup>b</sup>   | 6.537 ± 0.686 <sup>b</sup>  | 20.209 ± 0.817 <sup>a</sup> |
| C20:3n3     | 0.144 ± 0.042 <sup>a</sup>   | 0.096 ± 0.005 <sup>a</sup>   | 0.337 ± 0.107 <sup>b</sup>   | 0.315 ± 0.061 <sup>b</sup>  | 0.124 ± 0.027 <sup>a</sup>  |
| C20:5n3     | 0.521 ± 0.087 <sup>a</sup>   | 0.518 ± 0.068 <sup>a</sup>   | 5.443 ± 1.087 <sup>b</sup>   | 6.006 ± 0.336 <sup>b</sup>  | 0.508 ± 0.137 <sup>a</sup>  |
| C22:0       | 0.397 ± 0.229                | 0.116 ± 0.054                | 0.375 ± 0.370                | 0.278 ± 0.055               | 0.280 ± 0.152               |
| C22:2n6     | 0.193 ± 0.047 <sup>a</sup>   | 0.138 ± 0.022 <sup>a</sup>   | 0.022 ± 0.004 <sup>b</sup>   | 0.072 ± 0.039 <sup>b</sup>  | 0.045 ± 0.028 <sup>b</sup>  |
| C22:4n6     | 1.277 ± 0.373 <sup>a</sup>   | 1.245 ± 0.263 <sup>a</sup>   | 0.291 ± 0.011 <sup>b</sup>   | 0.277 ± 0.161 <sup>b</sup>  | 1.520 ± 0.122 <sup>a</sup>  |
| C24:0       | 0.138 ± 0.059 <sup>a</sup>   | 0.096 ± 0.021 <sup>a</sup>   | 1.971 ± 0.479 <sup>b</sup>   | 0.673 ± 0.114 <sup>c</sup>  | 0.096 ± 0.035 <sup>a</sup>  |
| C22:5n3     | 0.064 ± 0.022 <sup>a</sup>   | 0.066 ± 0.017 <sup>a</sup>   | 0.335 ± 0.028 <sup>b</sup>   | 0.344 ± 0.028 <sup>b</sup>  | 0.058 ± 0.012 <sup>a</sup>  |
| C22:6n3     | 7.736 ± 0.625 <sup>a</sup>   | 7.456 ± 0.865 <sup>a</sup>   | 11.400 ± 1.347 <sup>b</sup>  | 20.987 ± 0.961 <sup>c</sup> | 6.350 ± 0.267 <sup>a</sup>  |

Values marked with different letter in each group differed significantly.

**Table S6** Fatty acids composition (% w/w) in embryo on E9.5d (24h after VPA injection)

| Fatty acids | Olive oil                    | Olive oil+VPA                | Flaxseed oil+VPA             | Fish oil+VPA                | Corn oil+VPA                |
|-------------|------------------------------|------------------------------|------------------------------|-----------------------------|-----------------------------|
| C14:0       | 0.502 ± 0.151                | 0.562 ± 0.042                | 0.529 ± 0.144                | 0.672 ± 0.174               | 0.497 ± 0.039               |
| C14:1       | 0.064 ± 0.009 <sup>a</sup>   | 0.132 ± 0.049 <sup>b</sup>   | 0.114 ± 0.019 <sup>ab</sup>  | 0.114 ± 0.041 <sup>ab</sup> | 0.088 ± 0.041 <sup>ab</sup> |
| C15:0       | 0.230 ± 0.143 <sup>ab</sup>  | 0.177 ± 0.031 <sup>ab</sup>  | 0.185 ± 0.050 <sup>ab</sup>  | 0.276 ± 0.040 <sup>a</sup>  | 0.157 ± 0.019 <sup>b</sup>  |
| C16:0       | 17.833 ± 0.803 <sup>ab</sup> | 16.464 ± 0.379 <sup>ac</sup> | 18.023 ± 0.721 <sup>ab</sup> | 18.583 ± 1.314 <sup>b</sup> | 15.093 ± 1.336 <sup>c</sup> |
| C16:1       | 1.582 ± 0.278 <sup>a</sup>   | 1.484 ± 0.165 <sup>a</sup>   | 1.301 ± 0.179 <sup>a</sup>   | 1.515 ± 0.037 <sup>a</sup>  | 0.889 ± 0.117 <sup>b</sup>  |
| C18:0       | 21.108 ± 1.007               | 20.917 ± 1.593               | 22.325 ± 1.390               | 20.332 ± 2.257              | 22.750 ± 3.403              |
| C18:1       | 19.830 ± 1.048 <sup>a</sup>  | 20.532 ± 0.504 <sup>a</sup>  | 15.664 ± 1.277 <sup>b</sup>  | 14.508 ± 1.404 <sup>b</sup> | 14.034 ± 0.582 <sup>b</sup> |
| C18:2n6     | 8.318 ± 0.181 <sup>a</sup>   | 7.777 ± 0.101 <sup>a</sup>   | 11.224 ± 1.063 <sup>b</sup>  | 5.596 ± 0.502 <sup>c</sup>  | 11.382 ± 0.456 <sup>b</sup> |
| C18:3n6     | 0.190 ± 0.158 <sup>a</sup>   | 0.051 ± 0.004 <sup>b</sup>   | 0.068 ± 0.006 <sup>ab</sup>  | 0.046 ± 0.029 <sup>b</sup>  | 0.106 ± 0.017 <sup>ab</sup> |
| C18:3n3     | 0.075 ± 0.026 <sup>a</sup>   | 0.061 ± 0.012 <sup>a</sup>   | 0.888 ± 0.055 <sup>b</sup>   | 0.060 ± 0.006 <sup>a</sup>  | 0.039 ± 0.005 <sup>a</sup>  |
| C20:0       | 0.149 ± 0.034 <sup>a</sup>   | 0.188 ± 0.053 <sup>a</sup>   | 0.080 ± 0.014 <sup>bc</sup>  | 0.037 ± 0.009 <sup>b</sup>  | 0.096 ± 0.018 <sup>c</sup>  |
| C20:1       | 0.130 ± 0.044 <sup>a</sup>   | 0.150 ± 0.033 <sup>a</sup>   | 0.056 ± 0.024 <sup>bc</sup>  | 0.022 ± 0.007 <sup>b</sup>  | 0.080 ± 0.023 <sup>c</sup>  |
| C20:3n6     | 1.587 ± 0.085 <sup>a</sup>   | 1.691 ± 0.240 <sup>a</sup>   | 1.157 ± 0.216 <sup>b</sup>   | 0.875 ± 0.073 <sup>b</sup>  | 1.109 ± 0.278 <sup>b</sup>  |
| C20:4n6     | 17.900 ± 1.450 <sup>a</sup>  | 19.347 ± 0.541 <sup>a</sup>  | 9.230 ± 0.774 <sup>b</sup>   | 7.111 ± 0.615 <sup>b</sup>  | 23.126 ± 2.348 <sup>c</sup> |
| C20:3n3     | 0.193 ± 0.079 <sup>ab</sup>  | 0.115 ± 0.044 <sup>ac</sup>  | 0.262 ± 0.067 <sup>bd</sup>  | 0.309 ± 0.033 <sup>d</sup>  | 0.085 ± 0.027 <sup>c</sup>  |
| C20:5n3     | 0.431 ± 0.087 <sup>a</sup>   | 0.428 ± 0.064 <sup>a</sup>   | 4.556 ± 0.839 <sup>b</sup>   | 7.177 ± 0.663 <sup>c</sup>  | 0.490 ± 0.106 <sup>a</sup>  |
| C22:0       | 0.305 ± 0.226                | 0.240 ± 0.146                | 0.242 ± 0.087                | 0.225 ± 0.097               | 0.343 ± 0.131               |
| C22:2n6     | 0.187 ± 0.041 <sup>a</sup>   | 0.134 ± 0.008 <sup>b</sup>   | 0.020 ± 0.001 <sup>c</sup>   | 0.040 ± 0.023 <sup>c</sup>  | 0.055 ± 0.013 <sup>c</sup>  |
| C22:4n6     | 1.234 ± 0.305 <sup>a</sup>   | 1.357 ± 0.035 <sup>a</sup>   | 0.310 ± 0.033 <sup>b</sup>   | 0.297 ± 0.256 <sup>b</sup>  | 2.042 ± 0.357 <sup>c</sup>  |
| C24:0       | 0.136 ± 0.061 <sup>a</sup>   | 0.114 ± 0.025 <sup>a</sup>   | 2.170 ± 0.309 <sup>b</sup>   | 0.711 ± 0.204 <sup>c</sup>  | 0.109 ± 0.015 <sup>a</sup>  |
| C22:5n3     | 0.062 ± 0.022 <sup>a</sup>   | 0.089 ± 0.017 <sup>a</sup>   | 0.375 ± 0.038 <sup>b</sup>   | 0.525 ± 0.114 <sup>c</sup>  | 0.058 ± 0.027 <sup>a</sup>  |
| C22:6n3     | 7.953 ± 0.217 <sup>a</sup>   | 7.991 ± 0.664 <sup>a</sup>   | 11.220 ± 1.615 <sup>b</sup>  | 20.967 ± 1.025 <sup>c</sup> | 7.370 ± 1.245 <sup>a</sup>  |

Values marked with different letter in each group differed significantly.
